# Supplementary material for: Effect and mechanism of Salicornia bigelovii Torr. plant salt on blood pressure in SD rats
Source: Royal Society of Chemistry journal article supplement (doi:10.1039/c4fo00800f), 2015-01-01
Supplement: c4fo00800f1.pdf [file c4fo00800f1.pdf]

**Table 3. Na<sup>+</sup>-K<sup>+</sup>-ATPase, Ca<sup>2+</sup>-ATPase activity and serum biochemical indices**

| Groups | Renal cortex                                          |                                        |                                                       | Left ventricular muscle                |                |                 | Serum biochemical indices |                        |                           |  |  |
|--------|-------------------------------------------------------|----------------------------------------|-------------------------------------------------------|----------------------------------------|----------------|-----------------|---------------------------|------------------------|---------------------------|--|--|
|        | Na <sup>+</sup> -K <sup>+</sup> -ATPase<br>(U/mgprot) | Ca <sup>2+</sup> -ATPase<br>(U/mgprot) | Na <sup>+</sup> -K <sup>+</sup> -ATPase<br>(U/mgprot) | Ca <sup>2+</sup> -ATPase<br>(U/mgprot) | Ang II (ng/mL) | ET-1<br>(ng/mL) | NO<br>(μmol/L)            | creatinine<br>(μmol/L) | urea nitrogen<br>(mmol/L) |  |  |
| BC     | 6.13±0.29                                             | 4.85±0.34                              | 1.27±0.21                                             | 0.48±0.23                              | 134.78±44.13   | 100.17±15.66    | 5.57±0.88                 | 117.86±14.81           | 44.91±10.49               |  |  |
| ES     | 8.05±0.58**                                           | 6.30±0.94**                            | 1.40±0.43                                             | 0.70±0.40                              | 100.57±36.00   | 90.53±17.43     | 6.44±1.18                 | 214.29±28.95**         | 65.44±15.79*              |  |  |
| PS     | 6.65±0.58**#                                          | 5.09±0.60#                             | 1.34±0.29                                             | 0.60±0.20                              | 106.25±45.71   | 99.46±12.52     | 6.03±1.44                 | 153.97±17.43#          | 49.28±17.25               |  |  |

Values represent mean ± SD, \* means  $P < 0.05$  vs. BC; \*\* means  $P < 0.01$  vs. BC; # means  $P < 0.01$  vs. ES.

**Table 4. SOD activity and MDA content in each group**

| Groups | Serum                  |                          | Renal cortex               |                              | Left ventricular muscle    |                              | Liver                      |                              |
|--------|------------------------|--------------------------|----------------------------|------------------------------|----------------------------|------------------------------|----------------------------|------------------------------|
|        | SOD activity<br>(U/mL) | MDA content<br>(nmol/mL) | SOD activity<br>(U/mgprot) | MDA content<br>(nmol/mgprot) | SOD activity<br>(U/mgprot) | MDA content<br>(nmol/mgprot) | SOD activity<br>(U/mgprot) | MDA content<br>(nmol/mgprot) |
| BC     | 202.71±9.70            | 19.35±2.34               | 94.10±15.31                | 9.49±1.56                    | 89.39±19.49                | 9.67±1.50                    | 153.96±6.73                | 13.12±2.34                   |
| ES     | 179.29±23.91*          | 22.96±3.10               | 84.44±13.48                | 10.86±4.26                   | 59.97±19.85*               | 11.73±1.94*                  | 130.41±19.67               | 17.69±1.61*                  |
| PS     | 212.12±18.52##         | 17.31±1.13#              | 87.23±9.69                 | 9.31±1.71                    | 73.24±13.89                | 10.11±1.35                   | 158.96±27.22#              | 14.01±2.50                   |

Values represent mean±SD, \* means  $P<0.05$  vs. BC; # means  $P<0.05$  vs. ES; ## means  $P<0.01$  vs. ES.
